# Supplementary material
Source: Research Square preprint supplement (doi:10.21203/rs.3.rs-9729042/v1)
Supplement: Supplementary file 1 [file d987eae5fc3288442299ca23.docx]

**Appendix**

**ATinetti Balance & Gait Assessment**

*For both assessments, enter the date of each exam and circle your rating for each item. Indicate totals at the bottom of each section.*

**Balance Assessment Gait Assessment**

*To perform this assessment, seat the patient in a hard, armless chair. Stand with the patient. Walk across the room (+/- aids) at a usual pace, then rapidly*

| Evaluated Function | Description of Behavior | Date: | Date: |
| --- | --- | --- | --- |
| Sitting Balance | Leans or slides in chair Steady, safe | **0**  1* | 0  1* |
| Rises From | Unable to rise without help | 0 | 0 |
| Chair | Able to rise using arms to help | 1* | 1 |
|  | Able to rise without using arms to help | 2 | 2 |
| Attempts To | Unable to rise without help | 0 | 0 |
| Rise | Able to rise, requires more than one attempt Able to rise, requires one attempt | 1*  2 | 1  2* |
| Standing | Unsteady (staggers, moves feet, trunk sways) | 0 | 0 |
| Balance | Steady, but uses walker or other support | 1 | 1 |
| (1st 5 Seconds) | Steady without walker or other support | 2 | 2 |
| Standing | Unsteady | 0 | 0 |
| Balance | Steady, but with wide stance and uses support | 1 | 1 |
|  | Narrow stance without support | 2 | 2 |
| Nudged | Begins to fall | 0 | 0 |
|  | Staggers, grabs, catches self | 1 | 1 |
|  | Steady | 2 | 2 |
| Eyes Closed | Unsteady Steady | 0*  1 | 0*  1 |
| Turning 360 | Discontinuous steps | 0* | 0* |
| Degrees | Continuous steps | 1 | 1 |
|  | Unsteady (grabs, staggers) | 0* | 0 |
|  | Steady | 1 | (1) |
| Sitting Down | Unsafe (misjudged distance, falls into chair) | 0 | 0 |
| (Getting | Uses arms or not a smooth motion | 1* | 1* |
| Seated) | Safe, smooth motion | 2 | 2 |
| **Balance Score** | | 5 | 10 |
| Potential Points: 16 | | 16 | 16 |

| Evaluated Function | Description of Behavior | Date: | Date: |
| --- | --- | --- | --- |
| Indication of Gait | Any hesitancy or multiple attempts No hesitancy | 0*  1 | 0  1* |
| Step Length & Height | Step to  Step through right Step through left | 0*  1  1 | 0  1*  1* |
| Foot Clearance | Foot drop  Left foot clears the floor Right foot clears the floor | 0*  1  1 | 0  1*  1 |
| Step Symmetry | Right and left step length are not equal Right and left step length appear equal | 0*  1 | 0  1* |
| Step Continuity | Stopping of discontinuity between steps Steps appear continuous | 0*  1 | 0  1* |
| Path | Marked deviation  Mild/moderate deviation or uses a walking aid Straight without a walking aid | 0  1*  2 | 0  1*  2 |
| Trunk | Marked sway or uses a walking aid  No sway, flexes knees/back/uses arms to balance  No sway, no flexion of knees or back use of arms, or walking aid | 0  1*  2 | 0  1*  2 |
| Walking Time | Heels apart  Heels almost touching while walking | 0  1* | 0  1* |
| **Gait Score**  Potential Points: 12 | | *3*  12 | *9*  12 |

**Combined Score**

Potential Points For Balance & Gait

| 8 |  | 19 |  |
| --- | --- | --- | --- |
|  | 28 |  | 28 |

Risk of Falls: 18 Points or Less = High Risk, 19-23 Points = Moderate Risk, 24 or More Points = Low Risk
